# Supplementary material for: Sustainable agriculture with LEAFS: a low-cost electrochemical analyzer of foliage stress
Source: Royal Society of Chemistry journal article supplement (doi:10.1039/d3sd00296a), 2024-01-01
Supplement: d3sd00296a2.pdf [file d3sd00296a2.pdf]

# Sustainable Agriculture with LEAFS: a Low-cost Electrochemical Analyzer of Foliage Stress: Supplementary Information

Sina Khazaei Nejad, Haozheng Ma, Abdulrahman Al-shami,  
Ali Soleimani, Mona A Mohamed, Preston Dankwah,  
Hannah J. Lee, and Maral P. S. Mousavi

## 1 Parameter optimization

The raw data of square-wave voltammetry response of 200  $\mu\text{M}$  Salicylic acid (SA) in a Britton-Robinson buffer of pH 2.4 without any background subtraction is presented in SFig. 4. There is a small peak observed around 0.4 V which is not related to SA and could be a sign of contamination in certain batches of electrodes. However, it does not interfere with the SA peak and does not affect the sensor's performance.

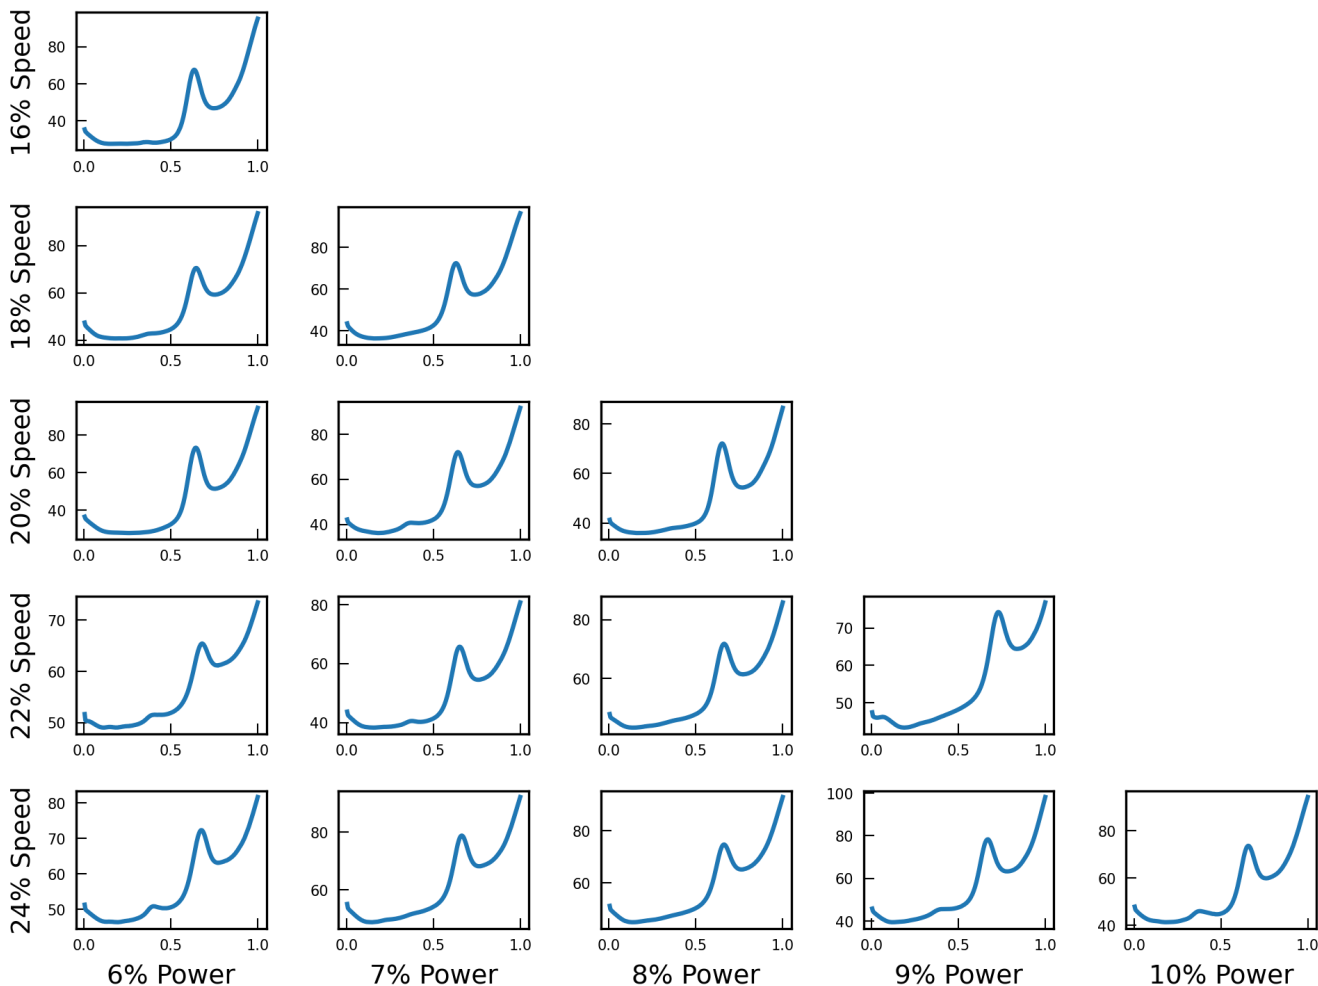

SFig. 1 Raw data of square-wave voltammetry response in 200  $\mu\text{M}$  SA solution.

## 2 Reproducibility test using SA

A reproducibility test using a 200  $\mu\text{M}$  SA in a Britton-Robinson buffer of pH 2.4 has been conducted within six independently fabricated electrodes. The relative standard deviation across the electrodes is 6.29%.

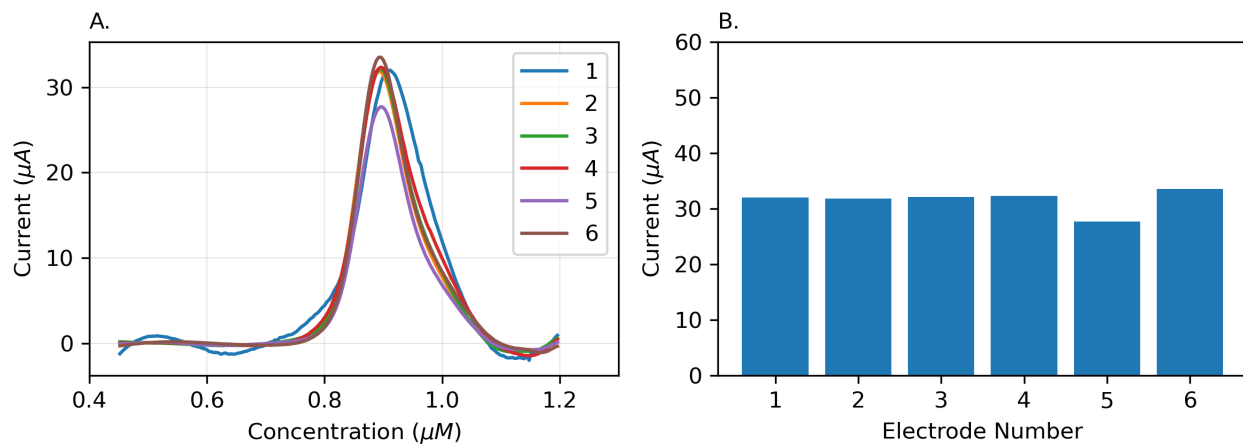

**SFig. 2** A. SWVs of 200  $\mu\text{M}$  SA in a Britton-Robinson buffer of pH 2.4 in six electrodes. B. The corresponding SA peak in six electrodes.

## 3 Electrode design

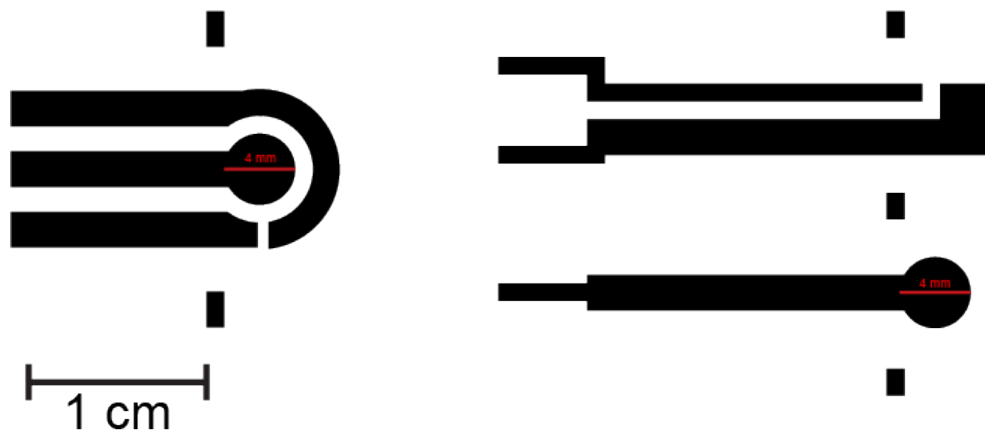

**SFig. 3** Designs used to fabricate the electrodes. Both of them has a circular working electrode with a diameter of 4 mm. The left and right designs are used for calibration, and in-situ measurements, respectively.

## 4 Flexibility test

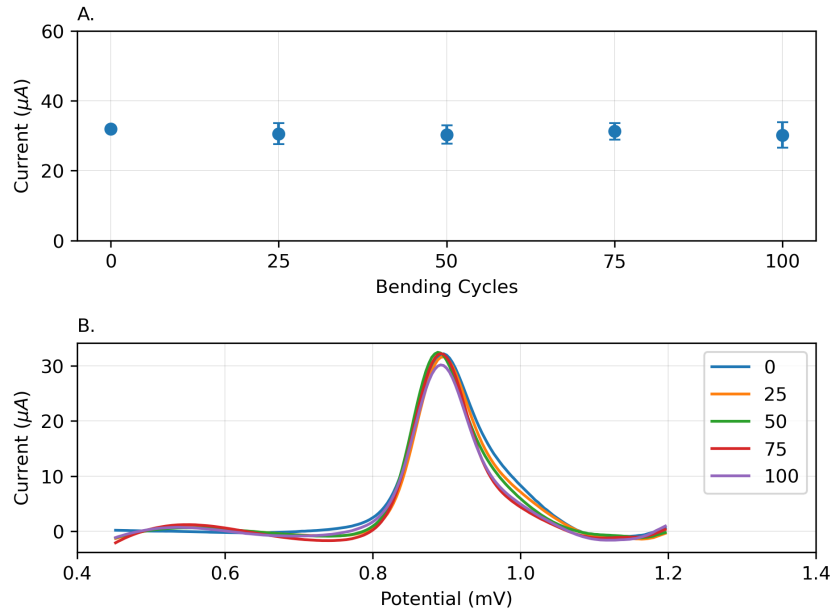

**SFig. 4** A. The SA peak current of 200 µMSA in Britton-Robinson buffer of pH 2.4 in SWVs over the course of 100 bending cycles. B. The corresponding SWV waveforms after 0, 25, 50, 75, and 100 bending cycles.

## 5 Prior works

**STable. 1** Comparison of the reported electrochemical methods.

| Sensor        | Materials used                                                        | Technique | Linear range/µM | LOD/µM | Reference |
|---------------|-----------------------------------------------------------------------|-----------|-----------------|--------|-----------|
| GCE           | graphene oxide                                                        | DPV       | 25–1400         | 10     | 1         |
| GCE           | Chitosan and Au@Fe <sub>3</sub> O <sub>4</sub>                        | DPV       | 1–1200          | 0.1    | 2         |
| Disk graphite | polypyrrole and entrapment of banana tissue                           | DPV       | 0.1–100         | 0.089  | 3         |
| CFE           | NA                                                                    | DPV       | 2–3000          | 1.68   | 4         |
| ITO           | Layer-by-layer films of carbon nanotubes, iron nanoparticles and PDAC | CV        | 6–100           | 0.105  | 5         |
| SPCE          | Anodized Carbon                                                       | SWV       | 16–300          | 5.6    | 6         |
| SPCE          | Carbon                                                                | DPV       | 1–200           | 1.6    | 7         |
| Graphite SPE  | ZnO/Al <sub>2</sub> O <sub>3</sub>                                    | DPV       | 0.5–80          | 0.25   | 8         |
| LIG           | Graphene                                                              | LSV       | 0.5–500         | 0.16   | 9         |
| LIG           | Graphene/Nafion                                                       | SWV       | 6.6–200         | 1.44   | This work |

GCE: glassy carbon electrode; CFE: carbon fiber electrode; ITO indium thin oxide; SPCE screen-printed carbon electrode; PDAC poly(diallyl dimethylammonium) chloride; LIG: laser-induced graphene.

## References

- [1] A. Vadivaambigai, P. A. Senthilvasan, N. Kothurkar and M. Rangarajan, *Nanoscience and Nanotechnology Letters*, 2015, **7**, 140–146.
- [2] L.-J. Sun, Z.-Q. Pan, J. Xie, X.-J. Liu, F.-T. Sun, F.-M. Song, N. Bao and H.-Y. Gu, *Journal of Electroanalytical Chemistry*, 2013, **706**, 127–132.
- [3] M. H. A. Zavar, S. Heydari and G. H. Rounaghi, *Arabian Journal for Science and Engineering*, 2013, **38**, 29–36.
- [4] J. Park and C. Eun, *Electrochimica Acta*, 2016, **194**, 346–356.

- [5] C. d. L. Ribeiro, J. G. M. Santos, J. R. de Souza, M. A. Pereira-da Silva and L. G. Paterno, *Journal of Electroanalytical Chemistry*, 2017, **805**, 53–59.
- [6] S. Rawlinson, A. McLister, P. Kanyong and J. Davis, *Microchemical Journal*, 2018, **137**, 71–77.
- [7] W. Detpisuttitham, C. Phanthong, S. Ngamchana, P. Rijiravanich and W. Surareungchai, *Journal of Analysis and Testing*, 2020, **4**, 291–297.
- [8] M. R. Ganjali, F. G. Nejad, S. Tajik, H. Beitollahi, E. Pourbasheer and B. Larijani, *International Journal of Electrochemical Science*, 2017, **12**, 9972–9982.
- [9] M. Li, P. Zhou, X. Wang, Y. Wen, L. Xu, J. Hu, Z. Huang and M. Li, *Computers and Electronics in Agriculture*, 2021, **191**, 106502.
